# Supplementary material
Source: Elsevier journal article supplement (https://www.sciencedirect.com/science/article/pii/S1665268120300569)
Supplement: mmc1 [file S1665268120300569:mmc1.pdf]

Supplementary Figure 1 legend

**Supplementary Figure 1. Deduced amino acid sequence analysis of the HBsAg.** Alignments of the deduced amino acid sequences obtained from ten S gen sequences of OBI patients. The alignment was performed using one reference HBV sequence genotype H (AY0954.1) with the CLCbio software. The colors shadow in the first line indicate the HBsAg domain. Residues identical to the genotype H reference consensus are indicated by dots. Mutations in red boxes.

Alignment of amino acid sequences deduced from OBI-39 sample clones

|               |            |            |            |            |            |            |                |
|---------------|------------|------------|------------|------------|------------|------------|----------------|
|               |            | 20         |            | 40         |            | 60         |                |
| AY090454.1    | MENITSGLLG | PLLVLQAV   | CF         | LLTKILTIPQ | SLDSWWTSLN | FLGVPPGCPG | QNSQSPI SNH 60 |
| OBI-39 CC2    | .....      | .....      | Y.         | .....      | .....      | .....      | 60             |
| OBI-39 P1 aa  | .....      | .....      | Y.         | .....      | .....      | .....      | 60             |
| OBI-39 P3 aa  | .....      | .....      | Y.         | .....      | .....      | .....      | 60             |
| OBI-39 P5 aa  | .....      | .....      | Y.         | .....      | .....      | .....      | 60             |
| OBI-39 P7 aa  | .....      | .....      | Y.         | .....      | .....      | .....      | 60             |
| OBI-39 P8 aa  | .....      | .....      | Y.         | .....      | .....      | .....      | 60             |
| OBI-39 P9 aa  | .....      | .....      | Y.         | .....      | P.         | .....      | 60             |
| OBI-39 P10 aa | .....      | .....      | Y.         | .....      | .....      | .....      | 60             |
| OBI-39 P12 aa | .....      | .....      | Y.         | .....      | .....      | .....      | 60             |
| OBI-39 P13 aa | .....      | .....      | Y.         | .....      | .....      | .....      | 60             |
| OBI-39 P14 aa | .....      | .....      | Y.         | .....      | .....      | .....      | 60             |
|               |            | 80         |            | 100        |            | 120        |                |
| AY090454.1    | LPTSCPPTCP | GYRWMCLRRF | ITFLFILLLC | LIFLLVLLDY | QGMLPVCPLL | PGSTTTSTGP | 120            |
| OBI-39 CC2    | .....      | .....      | .....      | .....      | .....      | .....      | 120            |
| OBI-39 P1 aa  | .....      | R.         | .....      | .....      | H.         | .....      | 120            |
| OBI-39 P3 aa  | .....      | .....      | .....      | .....      | .....      | .....      | 120            |
| OBI-39 P5 aa  | .....      | .....      | .....      | .....      | .....      | .....      | 120            |
| OBI-39 P7 aa  | .....      | .....      | .....      | .....      | .....      | .....      | 120            |
| OBI-39 P8 aa  | .....      | .....      | .....      | .....      | .....      | .....      | 120            |
| OBI-39 P9 aa  | .....      | .....      | R.         | .....      | .....      | .....      | 120            |
| OBI-39 P10 aa | .....      | .....      | .....      | .....      | .....      | .....      | 120            |
| OBI-39 P12 aa | .....      | .....      | .....      | .....      | .....      | .....      | 120            |
| OBI-39 P13 aa | .....      | .....      | .....      | .....      | .....      | A.         | 120            |
| OBI-39 P14 aa | .....      | .....      | .....      | .....      | .....      | .....      | 120            |
|               |            | 140        |            | 160        |            | 180        |                |
| AY090454.1    | CKTCTTLAQG | TSMFPSCCCT | KPSDGNCTCI | PIPSWAFGK  | YLWEWASARF | SWLSLLVQEV | 180            |
| OBI-39 CC2    | .....      | .....      | .....      | .....      | .....      | .....      | 180            |
| OBI-39 P1 aa  | .....      | .....      | .....      | .....      | .....      | .....      | 180            |
| OBI-39 P3 aa  | .....      | .....      | .....      | .....      | .....      | .....      | 180            |
| OBI-39 P5 aa  | .....      | .....      | .....      | .....      | .....      | .....      | 180            |
| OBI-39 P7 aa  | .....      | .....      | P.         | .....      | .....      | .....      | 180            |
| OBI-39 P8 aa  | .....      | .....      | .....      | .....      | .....      | .....      | 180            |
| OBI-39 P9 aa  | .....      | .....      | .....      | .....      | .....      | .....      | 180            |
| OBI-39 P10 aa | .....      | .....      | .....      | .....      | .....      | .....      | 180            |
| OBI-39 P12 aa | .....      | .....      | .....      | .....      | .....      | .....      | 180            |
| OBI-39 P13 aa | .....      | .....      | I.         | .....      | .....      | .....      | 180            |
| OBI-39 P14 aa | .....      | .....      | .....      | .....      | .....      | .....      | 180            |
|               |            | 200        |            | 220        |            |            |                |
| AY090454.1    | QWCVGLSPTV | WLLVIWMIWY | WGPNLCSILS | PFIPLLPIFC | YLWASI     |            | 226            |
| OBI-39 CC2    | .....      | .....      | .....      | .....      | .....      |            | 226            |
| OBI-39 P1 aa  | .....      | .....      | .....      | I.         | .....      |            | 226            |
| OBI-39 P3 aa  | .....      | .....      | .....      | I.         | .....      |            | 226            |
| OBI-39 P5 aa  | .....      | .....      | .....      | .....      | .....      |            | 226            |
| OBI-39 P7 aa  | .....      | .....      | .....      | .....      | .....      |            | 226            |
| OBI-39 P8 aa  | .....      | .....      | .....      | I.         | .....      |            | 226            |
| OBI-39 P9 aa  | .....      | .....      | .....      | .....      | .....      |            | 226            |
| OBI-39 P10 aa | .....      | S.         | .....      | .....      | .....      |            | 226            |
| OBI-39 P12 aa | .....      | .....      | .....      | .....      | .....      |            | 226            |
| OBI-39 P13 aa | .....      | .....      | .....      | .....      | .....      |            | 226            |
| OBI-39 P14 aa | .....      | .....      | .....      | .....      | .....      |            | 226            |

Alignment of amino acid sequences deduced from OBI-41 sample clones

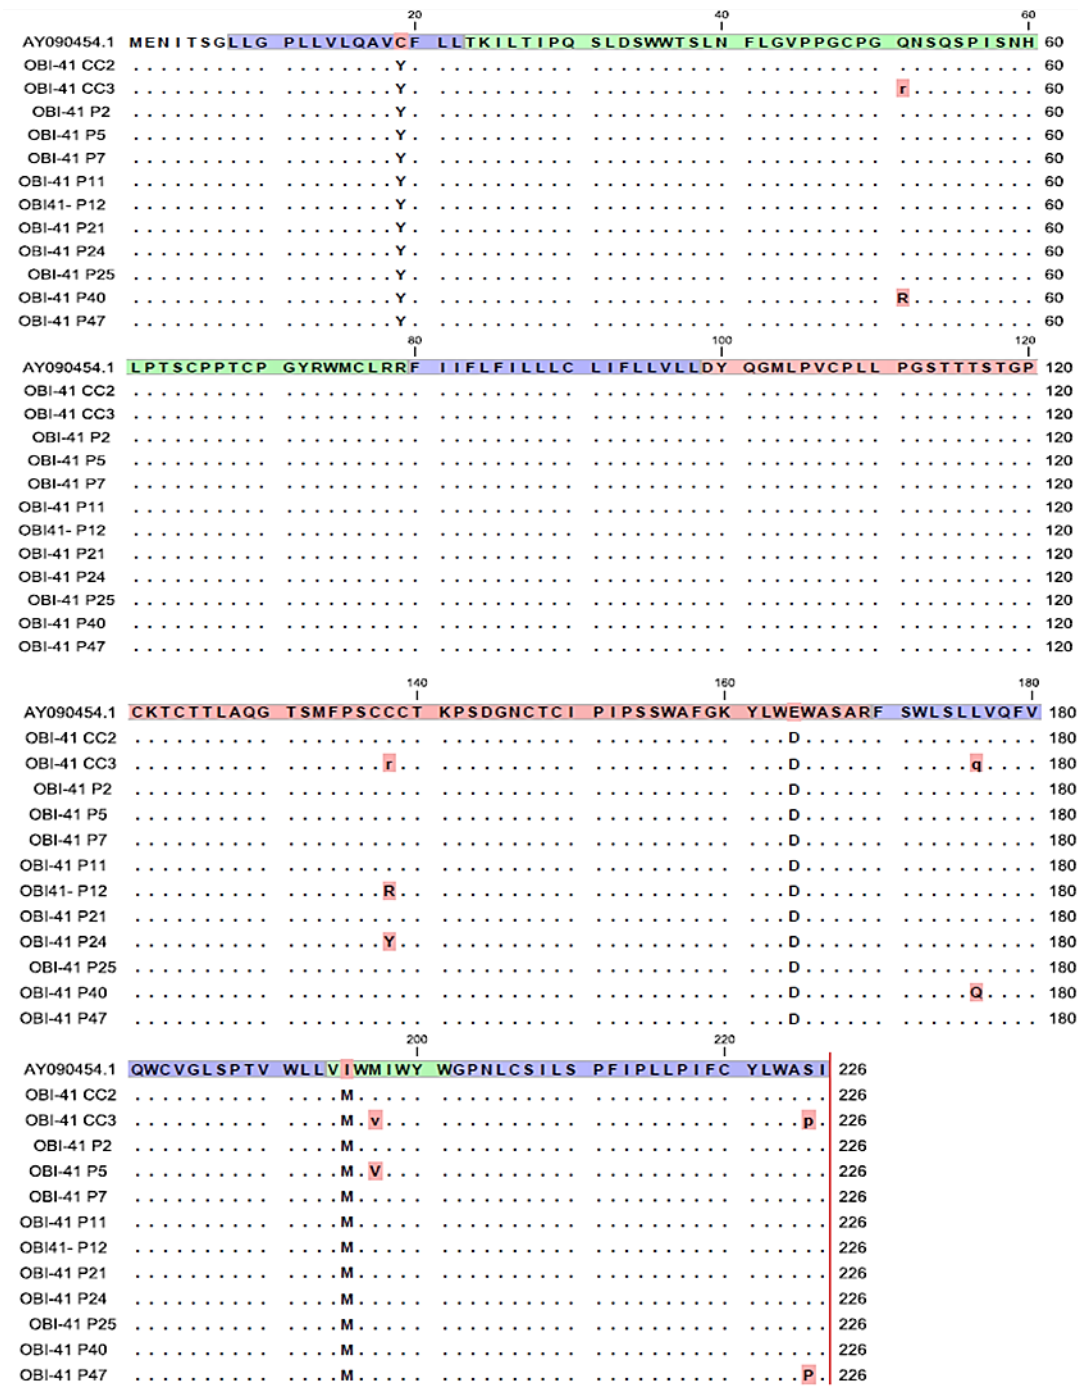

Supplementary Figure 1. Alignment of amino acid sequences deduced from sample clones OBI-43. Residues identical to the genotype H reference consensus are indicated by dots. Mutations in red boxes.

Alignment of amino acid sequences deduced from OBI-43 sample clones

|            |            |            |            |            |            |            |     |
|------------|------------|------------|------------|------------|------------|------------|-----|
|            |            | 20         |            | 40         |            | 60         |     |
| AY090454.1 | MENITSGLLG | PLLVLQAVCF | LLTKILTIPQ | SLDSWWTSLN | FLGVPPGCPG | QNSQSPISNH | 60  |
| OBI-43     | .....      | Y.         | .....      | .....      | .....      | .....      | 60  |
| OBI-43 P1  | .....      | Y.         | .....      | .....      | .....      | .....      | 60  |
| OBI-43 P5  | .....      | Y.         | .....      | .....      | .....      | .....      | 60  |
| OBI-43 P17 | .....      | Y.         | .....      | .....      | .....      | .....      | 60  |
| OBI-43 P19 | .....      | Y.         | .....      | .....      | .....      | .....      | 60  |
| OBI-43 P34 | .....      | Y.         | .....      | .....      | .....      | .....      | 60  |
| OBI-43 P36 | .....      | Y.         | .....      | .....      | .....      | D.         | 60  |
| OBI-43 P37 | .....      | Y.         | .....      | .....      | .....      | .....      | 60  |
| OBI-43 P40 | .....      | Y.         | .....      | .....      | .....      | .....      | 60  |
| OBI-43 P42 | .....      | Y.         | .....      | .....      | .....      | .....      | 60  |
| OBI-43 P43 | .....      | Y.         | .....      | .....      | .....      | .....      | 60  |
|            |            | 80         |            | 100        |            | 120        |     |
| AY090454.1 | LPTSCPPTCP | GYRWMCLRRF | IIFLFILLLC | LIFLLVLLDY | QGMLPVCPLL | PGSTTTSTGP | 120 |
| OBI-43     | .....      | .....      | .....      | .....      | .....      | .....      | 120 |
| OBI-43 P1  | .....      | .....      | .....      | .....      | .....      | .....      | 120 |
| OBI-43 P5  | .....      | .....      | V.         | .....      | .....      | .....      | 120 |
| OBI-43 P17 | .....      | .....      | .....      | .....      | Y.         | .....      | 120 |
| OBI-43 P19 | .....      | .....      | .....      | .....      | Y.         | .....      | 120 |
| OBI-43 P34 | .....      | .....      | .....      | .....      | .....      | .....      | 120 |
| OBI-43 P36 | .....      | .....      | .....      | .....      | .....      | .....      | 120 |
| OBI-43 P37 | C.         | .....      | .....      | .....      | Y.         | .....      | 120 |
| OBI-43 P40 | .....      | .....      | .....      | .....      | .....      | .....      | 120 |
| OBI-43 P42 | .....      | .....      | .....      | .....      | .....      | .....      | 120 |
| OBI-43 P43 | .....      | .....      | .....      | .....      | .....      | .....      | 120 |
|            |            | 140        |            | 160        |            | 180        |     |
| AY090454.1 | CKTCTTLAQG | TSMFPSCCCT | KPSDGNCTCI | PIPSSWAFGK | YLWEWASARF | SWLSLLVQFV | 180 |
| OBI-43     | .....      | .....      | .....      | .....      | .....      | .....      | 180 |
| OBI-43 P1  | .....      | .....      | .....      | .....      | .....      | .....      | 180 |
| OBI-43 P5  | .....      | .....      | .....      | .....      | .....      | .....      | 180 |
| OBI-43 P17 | .....      | .....      | .....      | .....      | .....      | .....      | 180 |
| OBI-43 P19 | .....      | .....      | .....      | .....      | .....      | .....      | 180 |
| OBI-43 P34 | .....      | .....      | .....      | .....      | C.         | .....      | 180 |
| OBI-43 P36 | .....      | .....      | .....      | .....      | .....      | .....      | 180 |
| OBI-43 P37 | .....      | .....      | .....      | .....      | .....      | .....      | 180 |
| OBI-43 P40 | .....      | .....      | .....      | .....      | .....      | .....      | 180 |
| OBI-43 P42 | .....      | .....      | .....      | .....      | .....      | .....      | 180 |
| OBI-43 P43 | .....      | .....      | .....      | .....      | .....      | .....      | 180 |
|            |            | 200        |            | 220        |            |            |     |
| AY090454.1 | QWCVGLSPTV | WLLVIWMIWY | WGNLCSILS  | PFIPLLPIFC | YLWAS      | I          | 226 |
| OBI-43     | .....      | M.         | .....      | .....      | .....      | .....      | 226 |
| OBI-43 P1  | T.         | .....      | .....      | .....      | .....      | .....      | 226 |
| OBI-43 P5  | .....      | .....      | .....      | .....      | .....      | .....      | 226 |
| OBI-43 P17 | .....      | .....      | .....      | .....      | .....      | .....      | 226 |
| OBI-43 P19 | T.         | .....      | .....      | .....      | .....      | .....      | 226 |
| OBI-43 P34 | .....      | .....      | .....      | .....      | .....      | .....      | 226 |
| OBI-43 P36 | .....      | .....      | .....      | .....      | .....      | .....      | 226 |
| OBI-43 P37 | .....      | .....      | .....      | .....      | .....      | .....      | 226 |
| OBI-43 P40 | .....      | .....      | .....      | .....      | .....      | .....      | 226 |
| OBI-43 P42 | .....      | .....      | .....      | .....      | .....      | .....      | 226 |
| OBI-43 P43 | .....      | .....      | .....      | .....      | .....      | .....      | 226 |

Supplementary Figure 1. Alignment of amino acid sequences deduced from sample clones OBI-43. Residues identical to the genotype H reference consensus are indicated by dots. Mutations in red boxes.

Alignment of amino acid sequences deduced from OBI-44 sample clones

|            |            |                                                           |            |                                                           |            |            |     |
|------------|------------|-----------------------------------------------------------|------------|-----------------------------------------------------------|------------|------------|-----|
|            |            | 20                                                        |            | 40                                                        |            | 60         |     |
| AY090454.1 | MENITSGLLG | PLLVLQAVCF                                                | LLTKILTIPQ | SLDSWWTSLN                                                | FLGVPPGCPG | QNSQSPISNH | 60  |
| OBI-44     | .....      | .....Y.                                                   | .....      | .....                                                     | .....      | .....      | 60  |
| OBI-44 P8  | .....      | ..... <span style="border: 1px solid red;">A</span> .     | .....      | .....                                                     | .....      | .....      | 60  |
| OBI-44 P11 | .....      | .....Y.                                                   | .....      | .....                                                     | .....      | .....      | 60  |
| OBI-44 P12 | .....      | .....Y.                                                   | .....      | .....                                                     | .....      | .....      | 60  |
| OBI-44 P14 | .....      | .....Y.                                                   | .....      | .....                                                     | .....      | .....      | 60  |
| OBI-44 P17 | .....      | .....Y.                                                   | .....      | .....                                                     | .....      | .....      | 60  |
| OBI-44 P19 | .....      | .....Y.                                                   | .....      | .....                                                     | .....      | .....      | 60  |
| OBI-44 P20 | .....      | ..... <span style="border: 1px solid red;">A</span> .     | .....      | .....                                                     | .....      | .....      | 60  |
| OBI-44 P22 | .....      | ..... <span style="border: 1px solid red;">A</span> .     | .....      | .....                                                     | .....      | .....      | 60  |
| OBI-44 P26 | .....      | .....Y.                                                   | .....      | .....                                                     | .....      | .....      | 60  |
| OBI-44 P30 | .....      | .....Y.                                                   | .....      | .....                                                     | .....      | .....      | 60  |
|            |            | 80                                                        |            | 100                                                       |            | 120        |     |
| AY090454.1 | LPTSCPPTCP | GYRWMCLRRF                                                | IIFLFILLIC | LIFLLVLLDY                                                | QGMLPVCPLL | PGSTTTSTGP | 120 |
| OBI-44     | .....      | .....                                                     | .....      | .....                                                     | .....      | .....      | 120 |
| OBI-44 P8  | .....      | .....                                                     | .....      | .....                                                     | .....      | .....      | 120 |
| OBI-44 P11 | .....      | .....                                                     | .....      | .....                                                     | .....      | .....      | 120 |
| OBI-44 P12 | .....      | .....                                                     | .....      | .....                                                     | .....      | .....      | 120 |
| OBI-44 P14 | .....      | .....                                                     | .....      | .....                                                     | .....      | .....      | 120 |
| OBI-44 P17 | .....      | .....                                                     | .....      | .....                                                     | .....      | .....      | 120 |
| OBI-44 P19 | .....      | .....                                                     | .....      | .....                                                     | .....      | .....      | 120 |
| OBI-44 P20 | .....      | .....                                                     | .....      | .....                                                     | .....      | .....      | 120 |
| OBI-44 P22 | .....      | .....                                                     | .....      | .....                                                     | .....      | .....      | 120 |
| OBI-44 P26 | .....      | .....                                                     | .....      | .....                                                     | .....      | .....      | 120 |
| OBI-44 P30 | .....      | .....                                                     | .....      | .....                                                     | .....      | .....      | 120 |
|            |            | 140                                                       |            | 160                                                       |            | 180        |     |
| AY090454.1 | CKTCTTLAQG | TSMFPSCCCT                                                | KPSDGNCTCI | PIPSWAFGK                                                 | YLWEWASARE | SWLSLLVQEV | 180 |
| OBI-44     | .....      | .....                                                     | .....      | .....                                                     | .....      | .....      | 180 |
| OBI-44 P8  | .....      | .....                                                     | .....      | ..... <span style="border: 1px solid red;">S</span> ..... | .....      | .....      | 180 |
| OBI-44 P11 | .....      | .....                                                     | .....      | .....                                                     | .....      | .....      | 180 |
| OBI-44 P12 | .....      | .....                                                     | .....      | .....                                                     | .....      | .....      | 180 |
| OBI-44 P14 | .....      | .....                                                     | .....      | .....                                                     | .....      | .....      | 180 |
| OBI-44 P17 | .....      | .....                                                     | .....      | .....                                                     | .....      | .....      | 180 |
| OBI-44 P19 | .....      | .....                                                     | .....      | .....                                                     | .....      | .....      | 180 |
| OBI-44 P20 | .....      | .....                                                     | .....      | ..... <span style="border: 1px solid red;">S</span> ..... | .....      | .....      | 180 |
| OBI-44 P22 | .....      | ..... <span style="border: 1px solid red;">R</span> ..... | .....      | .....                                                     | .....      | .....      | 180 |
| OBI-44 P26 | .....      | .....                                                     | .....      | .....                                                     | .....      | .....      | 180 |
| OBI-44 P30 | .....      | .....                                                     | .....      | .....                                                     | .....      | .....      | 180 |
|            |            | 200                                                       |            | 220                                                       |            |            |     |
| AY090454.1 | QWCVGLSPTV | WLLVIWMIWY                                                | WGPNLCSILS | PFIPLLPIFC                                                | YLWASI     |            | 226 |
| OBI-44     | .....      | .....                                                     | .....      | .....                                                     | .....      |            | 226 |
| OBI-44 P8  | .....      | .....                                                     | .....      | .....                                                     | .....      |            | 226 |
| OBI-44 P11 | .....      | .....                                                     | .....      | .....                                                     | .....      |            | 226 |
| OBI-44 P12 | .....      | .....                                                     | .....      | .....                                                     | .....      |            | 226 |
| OBI-44 P14 | .....      | .....                                                     | .....      | .....                                                     | .....      |            | 226 |
| OBI-44 P17 | .....      | .....                                                     | .....      | .....                                                     | .....      |            | 226 |
| OBI-44 P19 | .....      | .....                                                     | .....      | .....                                                     | .....      |            | 226 |
| OBI-44 P20 | .....      | .....                                                     | .....      | .....                                                     | .....      |            | 226 |
| OBI-44 P22 | .....      | .....                                                     | .....      | .....                                                     | .....      |            | 226 |
| OBI-44 P26 | .....      | .....                                                     | .....      | .....                                                     | .....      |            | 226 |
| OBI-44 P30 | .....      | .....                                                     | .....      | .....                                                     | .....      |            | 226 |

Supplementary Figure 1. Alignment of amino acid sequences deduced from sample clones OBI-44. Residues identical to the genotype H reference consensus are indicated by dots. Mutations in red boxes.

Alignment of amino acid sequences deduced from OBI-50 sample clones

|              |            |            |            |            |            |            |       |     |
|--------------|------------|------------|------------|------------|------------|------------|-------|-----|
| AY090454.1   | MENITSGLLG | PLLVLQAVCF | LLTKILTIPQ | SLDSWWTSLN | FLGVPPGCPG | QNSQSPI    | SNH   | 60  |
| OBI-50       | .....      | .....      | .....      | .....      | .....      | .....      | ..... | 60  |
| OBI-50 P1    | .....      | A          | .....      | H          | E          | .....      | ..... | 60  |
| OBI-50 P3    | .....      | .....      | .....      | .....      | .....      | .....      | ..... | 60  |
| OBI-50 P6    | .....      | .....      | RK         | H          | E          | .....      | ..... | 60  |
| OBI-50 P13   | .....      | .....      | .....      | .....      | .....      | .....      | ..... | 60  |
| OBI-50 P15-1 | .....      | .....      | R          | K          | .....      | .....      | ..... | 60  |
| OBI-50 P17   | P          | .....      | RK         | .....      | .....      | .....      | ..... | 60  |
| OBI-50 P22   | .....      | .....      | .....      | .....      | .....      | .....      | ..... | 60  |
| OBI-50 P24   | .....      | .....      | .....      | .....      | .....      | .....      | ..... | 60  |
| OBI-50 P28-1 | P          | .....      | .....      | .....      | .....      | .....      | ..... | 60  |
| OBI-50 P32   | .....      | I          | .....      | .....      | .....      | .....      | ..... | 60  |
| AY090454.1   | LPTSCPPTCP | GYRWMCLRRF | IIFLFILLLC | LIFLLVLLDY | QGMLPVCPLL | PGSTTTSTGP |       | 120 |
| OBI-50       | .....      | .....      | .....      | .....      | .....      | .....      | ..... | 120 |
| OBI-50 P1    | .....      | .....      | .....      | .....      | .....      | .....      | ..... | 120 |
| OBI-50 P3    | .....      | .....      | .....      | .....      | .....      | .....      | ..... | 120 |
| OBI-50 P6    | .....      | .....      | .....      | .....      | .....      | .....      | ..... | 120 |
| OBI-50 P13   | .....      | .....      | .....      | .....      | .....      | .....      | ..... | 120 |
| OBI-50 P15-1 | .....      | .....      | .....      | .....      | .....      | .....      | ..... | 120 |
| OBI-50 P17   | .....      | .....      | .....      | .....      | .....      | .....      | ..... | 120 |
| OBI-50 P22   | .....      | .....      | .....      | .....      | .....      | .....      | ..... | 120 |
| OBI-50 P24   | .....      | .....      | .....      | .....      | .....      | .....      | ..... | 120 |
| OBI-50 P28-1 | .....      | .....      | .....      | .....      | .....      | .....      | *     | 120 |
| OBI-50 P32   | .....      | .....      | .....      | .....      | .....      | .....      | ..... | 120 |
| AY090454.1   | CKTCTTLAQG | TSMFPSCCCT | KPSDGNCTCI | PIPSSWAFGK | YLWEWASARF | SWLSLLVQFV |       | 180 |
| OBI-50       | .....      | H          | .....      | .....      | *          | .....      | ..... | 180 |
| OBI-50 P1    | AF         | *          | .....      | .....      | *          | .....      | ..... | 180 |
| OBI-50 P3    | .....      | H          | .....      | .....      | D          | .....      | ..... | 180 |
| OBI-50 P6    | .....      | H          | .....      | .....      | D          | .....      | ..... | 180 |
| OBI-50 P13   | .....      | H          | L          | G          | D          | .....      | ..... | 180 |
| OBI-50 P15-1 | .....      | H          | .....      | .....      | D          | S          | P     | 180 |
| OBI-50 P17   | .....      | *          | .....      | .....      | *          | .....      | ..... | 180 |
| OBI-50 P22   | .....      | H          | L          | G          | D          | .....      | ..... | 180 |
| OBI-50 P24   | .....      | H          | .....      | .....      | D          | .....      | ..... | 180 |
| OBI-50 P28-1 | R          | *          | .....      | .....      | *          | *          | ..... | 180 |
| OBI-50 P32   | .....      | *          | .....      | .....      | *          | .....      | ..... | 180 |
| AY090454.1   | QWCVGLSPTV | WLLVIWMIWY | WGNLCSILS  | PEIPLLPIFC | YLWASI     |            |       | 226 |
| OBI-50       | .....      | *          | .....      | .....      | .....      | .....      | ..... | 226 |
| OBI-50 P1    | .....      | *          | .....      | .....      | .....      | .....      | ..... | 226 |
| OBI-50 P3    | .....      | M          | V          | .....      | Y          | .....      | ..... | 226 |
| OBI-50 P6    | .....      | R          | M          | .....      | .....      | .....      | ..... | 226 |
| OBI-50 P13   | .....      | M          | .....      | .....      | .....      | .....      | ..... | 226 |
| OBI-50 P15-1 | .....      | *          | .....      | .....      | .....      | .....      | ..... | 226 |
| OBI-50 P17   | .....      | *          | .....      | .....      | .....      | .....      | ..... | 226 |
| OBI-50 P22   | .....      | M          | .....      | .....      | .....      | .....      | ..... | 226 |
| OBI-50 P24   | .....      | M          | V          | .....      | .....      | .....      | ..... | 226 |
| OBI-50 P28-1 | .....      | M          | .....      | .....      | .....      | .....      | ..... | 226 |
| OBI-50 P32   | .....      | *          | .....      | .....      | .....      | .....      | ..... | 226 |

Supplementary Figure 1. Alignment of amino acid sequences deduced from sample clones OBI-50. Residues identical to the genotype H reference consensus are indicated by dots. Mutations in red boxes.





Alignment of amino acid sequences deduced from OBI-62 sample clones

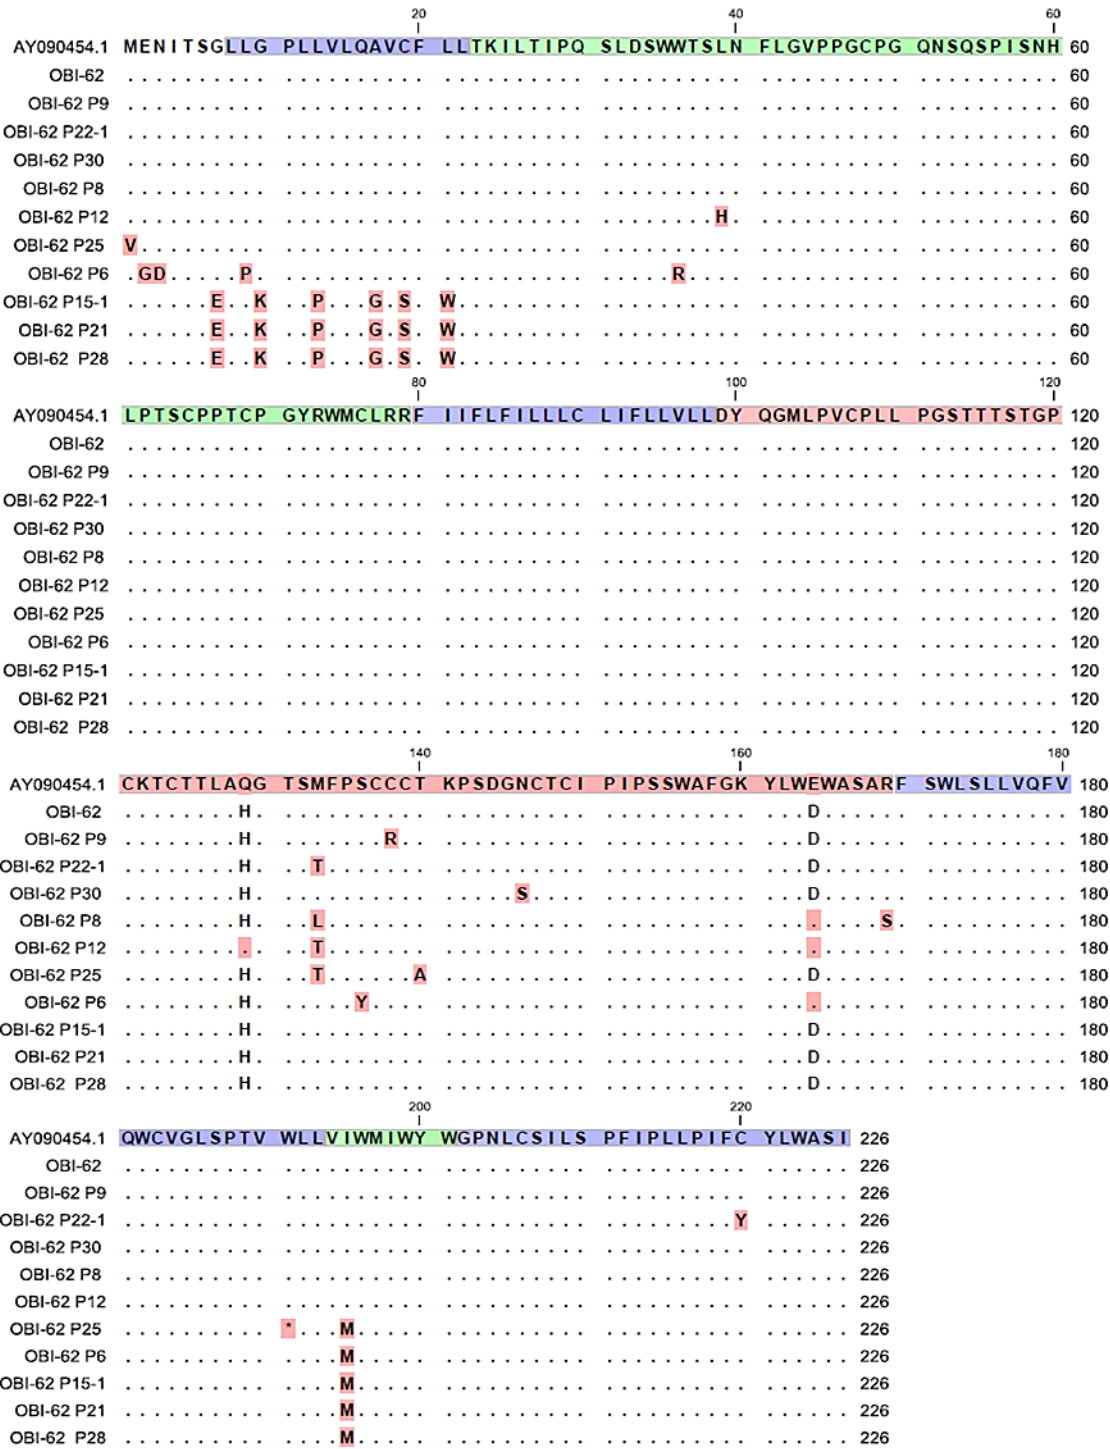

Supplementary Figure 1. Alignment of amino acid sequences deduced from sample clones OBI-62. Residues identical to the genotype H reference consensus are indicated by dots. Mutations in red boxes.

Alignment of amino acid sequences deduced from OBI-75 sample clones

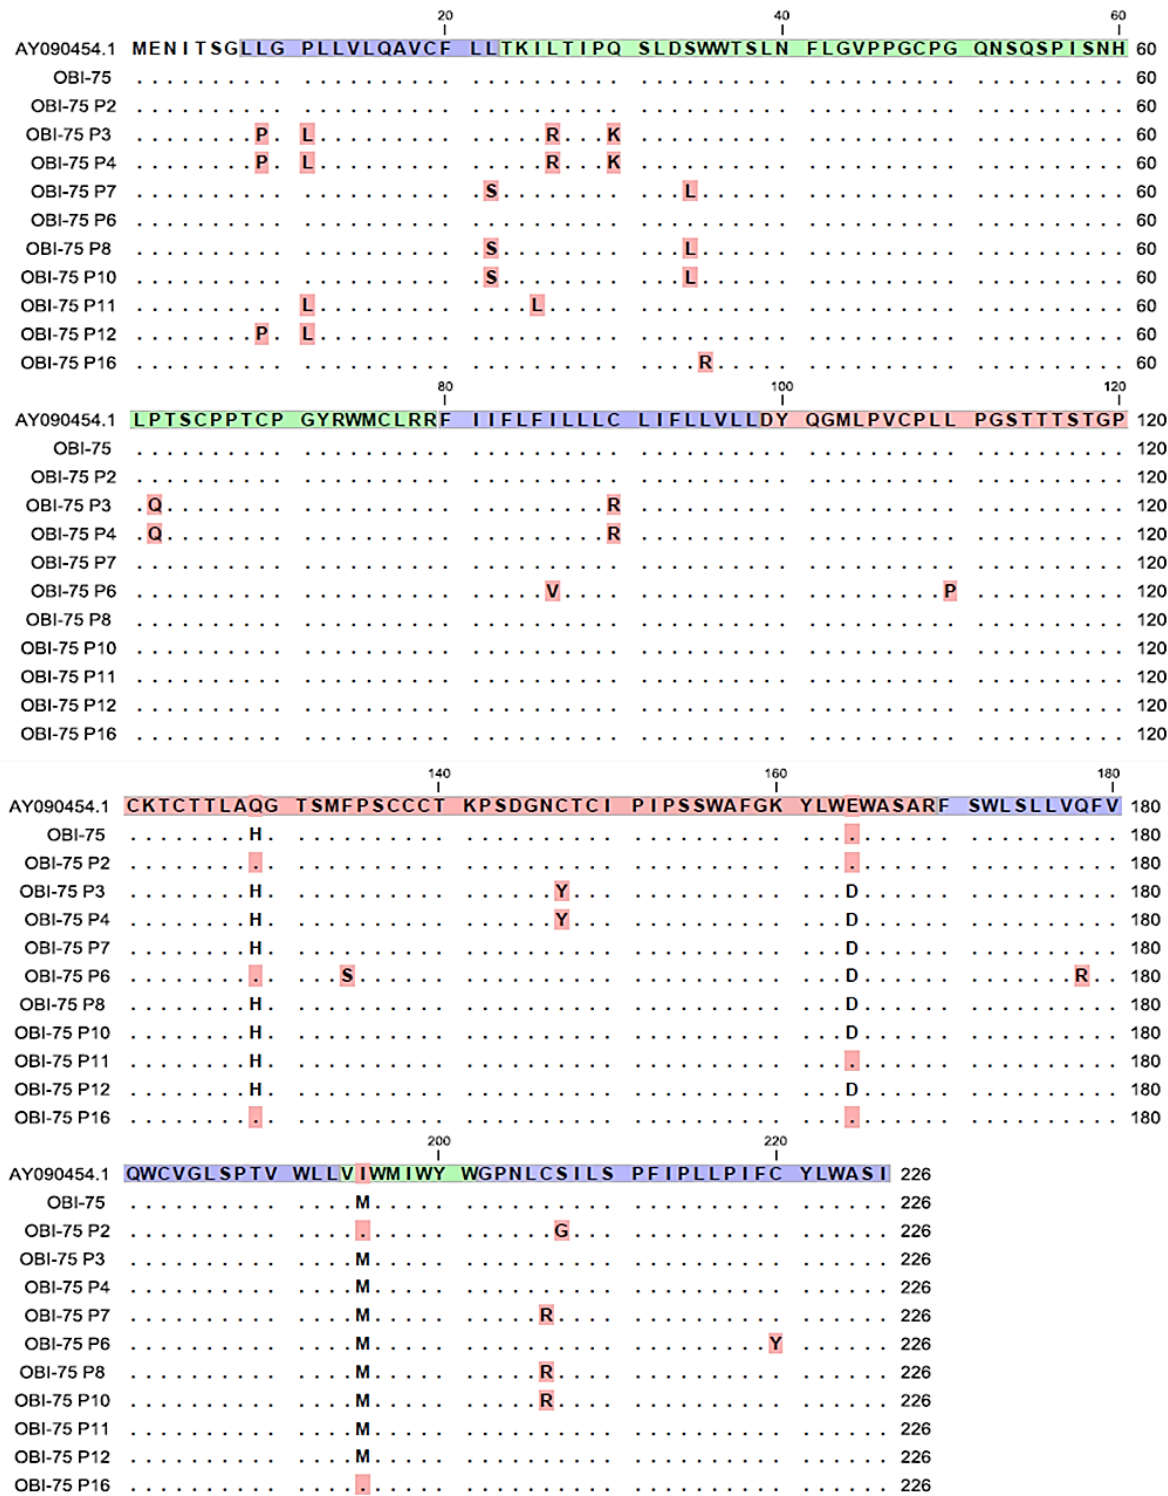

Supplementary Figure 1. Alignment of amino acid sequences deduced from sample clones OBI-75. Residues identical to the genotype H reference consensus are indicated by dots. Mutations in red boxes.



Alignment of amino acid sequences deduced from OBI-106 sample clones

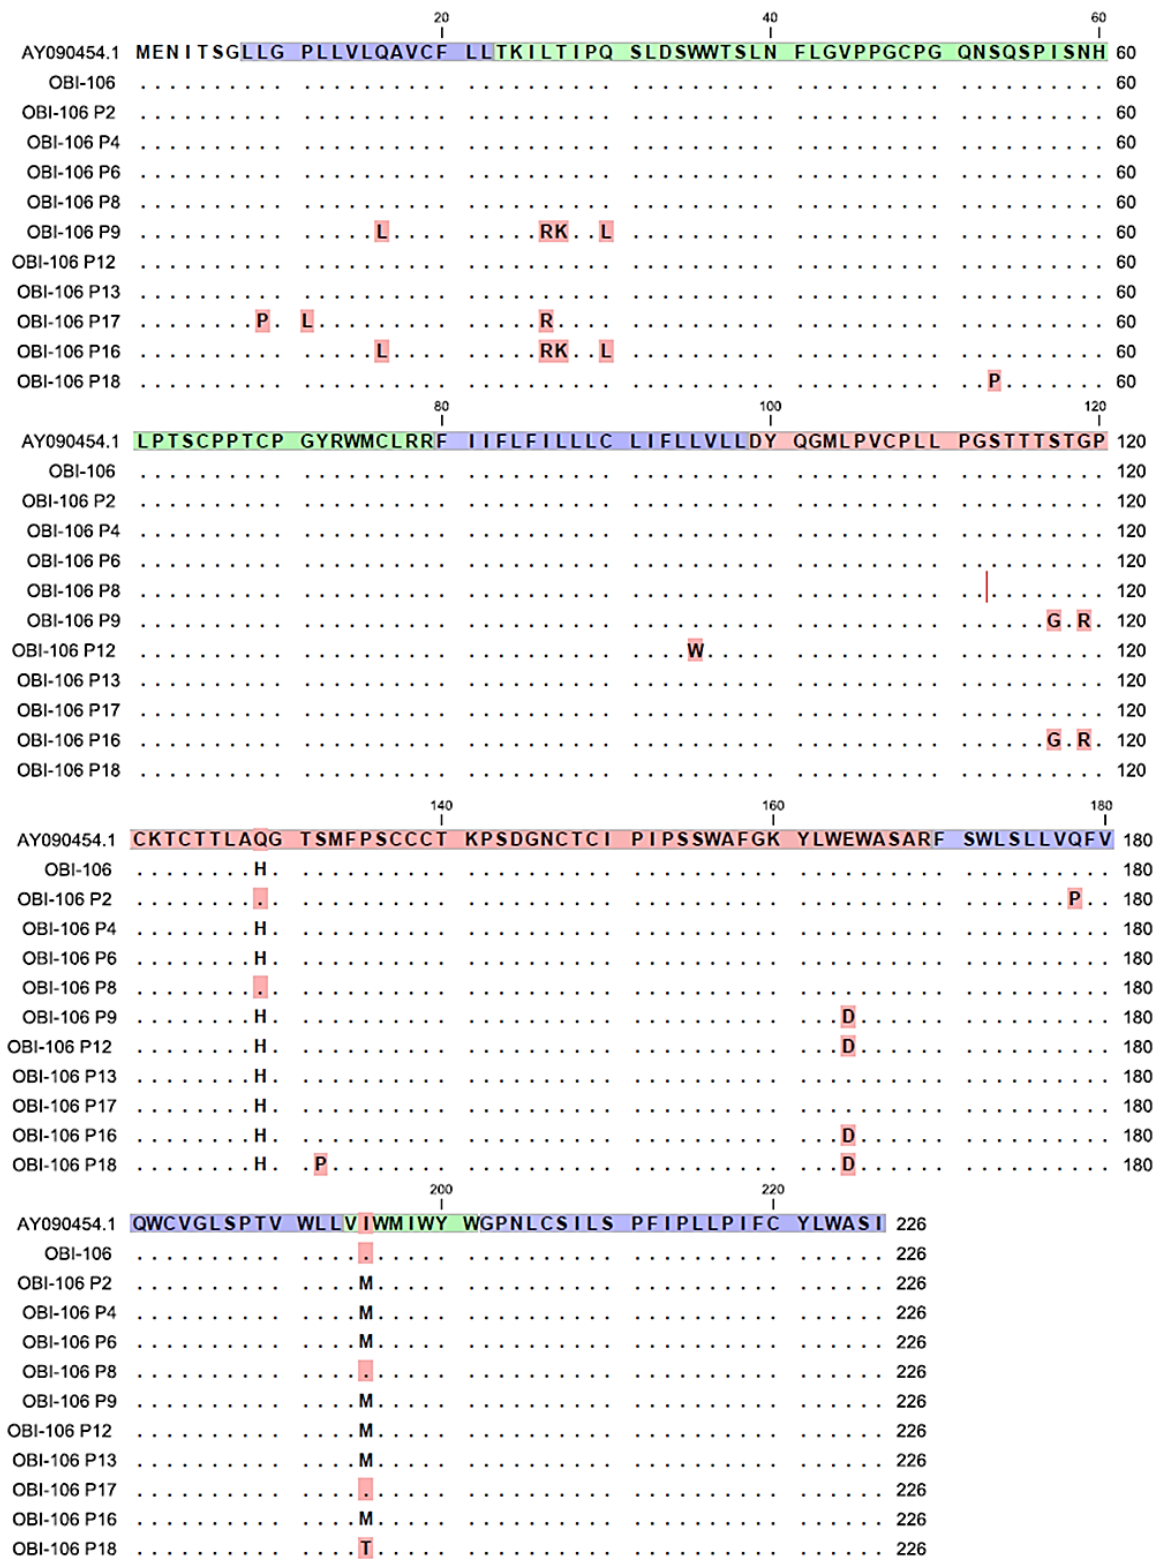

**Supplementary Figure 1.** Alignment of amino acid sequences deduced from sample clones OBI-106. Residues identical to the genotype H reference consensus are indicated by dots. Mutations in red boxes.

Alignment of amino acid sequences deduced from OBI-112 sample clones

|             |            |             |            |            |            |             |     |
|-------------|------------|-------------|------------|------------|------------|-------------|-----|
|             |            | 20          |            | 40         |            | 60          |     |
| AY090454.1  | MENITSGLLG | PLLVLQAVCF  | LLTKILTIPQ | SLDSWWTSLN | FLGVPPGCPG | QNSQSPI SNH | 60  |
| OBI-112     | .....      | .....Y.     | .....      | .....      | .....      | .....       | 60  |
| OBI-112 P3  | .....      | .....Y.     | .....      | .....      | .....      | .....       | 60  |
| OBI-112 P10 | .....      | .....Y.     | .....      | .....      | .....      | .....       | 60  |
| OBI-112 P11 | .....      | .....Y.     | .....      | .....      | .....      | .....       | 60  |
| OBI-112 P12 | .....      | .....Y.     | .....      | .....      | .....      | .....       | 60  |
| OBI-112 P13 | .....      | .....Y.     | .....      | .....      | .....      | .....       | 60  |
| OBI-112 P4  | .....      | .....Y.     | .....      | .....      | .....      | .....       | 60  |
| OBI-112 P9  | .....      | ......      | .....      | .....      | .....      | .....       | 60  |
| OBI-112 P15 | .....      | .....Y.     | .....      | .....      | .....      | .....       | 60  |
|             |            | 80          |            | 100        |            | 120         |     |
| AY090454.1  | LPTSCPPTCP | GYRWMCLRRF  | IIFLFILLLC | LIFLLVLLDY | QGMLPVCPLL | PGSTTTSTGP  | 120 |
| OBI-112     | .....      | .....       | .....      | .....      | .....      | .....       | 120 |
| OBI-112 P3  | .....      | .....       | .....      | .....      | .....      | .....       | 120 |
| OBI-112 P10 | .....      | .....       | .....      | .....      | .....      | .....       | 120 |
| OBI-112 P11 | .....      | .....       | .....      | .....      | .....      | .....       | 120 |
| OBI-112 P12 | .....      | .....       | .....      | .....      | .....      | .....       | 120 |
| OBI-112 P13 | .....      | .....       | .....      | .....      | .....      | .....       | 120 |
| OBI-112 P4  | .....      | .....       | .....      | .....      | .....      | .....       | 120 |
| OBI-112 P9  | .....      | .....       | .....      | .....      | .....      | .....       | 120 |
| OBI-112 P15 | .....      | .....R.     | .....      | .....      | .....      | .....       | 120 |
|             |            | 140         |            | 160        |            | 180         |     |
| AY090454.1  | CKTCTTLAQG | TSMFPSCCCT  | KPSDGNCTCI | PIPSSWAFGK | YLWEWASARF | SWLSLLVQFV  | 180 |
| OBI-112     | .....      | .....       | .....      | .....      | .....      | .....       | 180 |
| OBI-112 P3  | .....      | .....       | .....      | .....      | .....      | .....       | 180 |
| OBI-112 P10 | .....      | .....       | .....      | .....      | .....      | .....       | 180 |
| OBI-112 P11 | .....      | .....       | .....      | .....      | .....      | .....       | 180 |
| OBI-112 P12 | .....      | .....       | .....      | .....      | .....      | .....       | 180 |
| OBI-112 P13 | .....      | .....       | .....      | .....      | .....      | .....       | 180 |
| OBI-112 P4  | .....      | .....       | .....      | .....      | .....      | .....       | 180 |
| OBI-112 P9  | .....      | .....       | .....      | .....      | .....      | .....       | 180 |
| OBI-112 P15 | .....      | .....       | .....      | .....      | .....      | .....       | 180 |
|             |            | 200         |            | 220        |            |             |     |
| AY090454.1  | QWCVGLSPTV | WLLVITWMIWY | WGPNLCSILS | PFIPLLPIFC | YLWASI     |             | 226 |
| OBI-112     | .....      | ......      | .....      | .....      | .....      | .....       | 226 |
| OBI-112 P3  | .....      | .....M.     | .....      | .....      | .....      | .....       | 226 |
| OBI-112 P10 | .....      | .....M.     | .....      | .....      | .....      | .....       | 226 |
| OBI-112 P11 | .....      | .....M.     | .....      | .....      | .....      | .....       | 226 |
| OBI-112 P12 | .....      | .....M.     | .....      | .....      | .....      | .....       | 226 |
| OBI-112 P13 | .....      | .....M.     | .....      | .....      | .....      | .....       | 226 |
| OBI-112 P4  | .....      | .....M.     | .....      | .....      | .....      | .....       | 226 |
| OBI-112 P9  | .....A.    | .....M.     | .....      | .....      | .....      | .....       | 226 |
| OBI-112 P15 | .....      | .....M.     | .....      | .....      | .....      | .....       | 226 |

Supplementary Figure 1. Alignment of amino acid sequences deduced from sample clones OBI-112. Residues identical to the genotype H reference consensus are indicated by dots. Mutations in red boxes.
