# Supplementary material
Source: Elsevier journal article supplement (https://www.sciencedirect.com/science/article/pii/S1665268120300569)
Supplement: mmc1 [file S1665268120300569:mmc1.pdf]

|               | 20                                                                 | 40  | 60  |
|---------------|--------------------------------------------------------------------|-----|-----|
| AY090454.1    | MENITSGLLG PLLVLQAVCF LLTKILTIPQ SLDSWWTSLN FLGVPPGCPG QNSQSPI SNH |     | 60  |
| OBI-39 CC2    | .....Y.....                                                        |     | 60  |
| OBI-39 P1 aa  | .....Y.....                                                        |     | 60  |
| OBI-39 P3 aa  | .....Y.....                                                        |     | 60  |
| OBI-39 P5 aa  | .....Y.....                                                        |     | 60  |
| OBI-39 P7 aa  | .....Y.....                                                        |     | 60  |
| OBI-39 P8 aa  | .....Y.....                                                        |     | 60  |
| OBI-39 P9 aa  | .....Y.....P.....                                                  |     | 60  |
| OBI-39 P10 aa | .....Y.....                                                        |     | 60  |
| OBI-39 P12 aa | .....Y.....                                                        |     | 60  |
| OBI-39 P13 aa | .....Y.....                                                        |     | 60  |
| OBI-39 P14 aa | .....Y.....                                                        |     | 60  |
|               | 80                                                                 | 100 | 120 |
| AY090454.1    | LPTSCPPTCP GYRWMCLRRF IIFLEILLCL LIFLLVLLDY QGMLPVCPL PGSTTTSTGP   |     | 120 |
| OBI-39 CC2    | .....                                                              |     | 120 |
| OBI-39 P1 aa  | ...R.....H.....                                                    |     | 120 |
| OBI-39 P3 aa  | .....                                                              |     | 120 |
| OBI-39 P5 aa  | .....                                                              |     | 120 |
| OBI-39 P7 aa  | .....                                                              |     | 120 |
| OBI-39 P8 aa  | .....                                                              |     | 120 |
| OBI-39 P9 aa  | ...R.....                                                          |     | 120 |
| OBI-39 P10 aa | .....                                                              |     | 120 |
| OBI-39 P12 aa | .....                                                              |     | 120 |
| OBI-39 P13 aa | .....A.....                                                        |     | 120 |
| OBI-39 P14 aa | .....                                                              |     | 120 |
|               | 140                                                                | 160 | 180 |
| AY090454.1    | CKTCTTLAQG TSMFPSCCCT KPSDGNCTCI PIPSSWAFGK YLWEWASARF SWLSLLVQFV  |     | 180 |
| OBI-39 CC2    | .....                                                              |     | 180 |
| OBI-39 P1 aa  | .....                                                              |     | 180 |
| OBI-39 P3 aa  | .....                                                              |     | 180 |
| OBI-39 P5 aa  | .....                                                              |     | 180 |
| OBI-39 P7 aa  | ...P.....                                                          |     | 180 |
| OBI-39 P8 aa  | .....                                                              |     | 180 |
| OBI-39 P9 aa  | .....                                                              |     | 180 |
| OBI-39 P10 aa | .....                                                              |     | 180 |
| OBI-39 P12 aa | .....                                                              |     | 180 |
| OBI-39 P13 aa | ...I.....                                                          |     | 180 |
| OBI-39 P14 aa | .....                                                              |     | 180 |
|               | 200                                                                | 220 |     |
| AY090454.1    | QWCVGLSPTV WLLVIWMIWY WGNLCSILS PFIPLLPIFC YLWASI                  | 226 |     |
| OBI-39 CC2    | .....                                                              |     | 226 |
| OBI-39 P1 aa  | .....I.....                                                        |     | 226 |
| OBI-39 P3 aa  | .....I.....                                                        |     | 226 |
| OBI-39 P5 aa  | .....                                                              |     | 226 |
| OBI-39 P7 aa  | .....                                                              |     | 226 |
| OBI-39 P8 aa  | .....I.....                                                        |     | 226 |
| OBI-39 P9 aa  | .....                                                              |     | 226 |
| OBI-39 P10 aa | ...S.....                                                          |     | 226 |
| OBI-39 P12 aa | .....                                                              |     | 226 |
| OBI-39 P13 aa | .....                                                              |     | 226 |
| OBI-39 P14 aa | .....                                                              |     | 226 |

Alignment of amino acid sequences deduced from OBI-41 sample clones

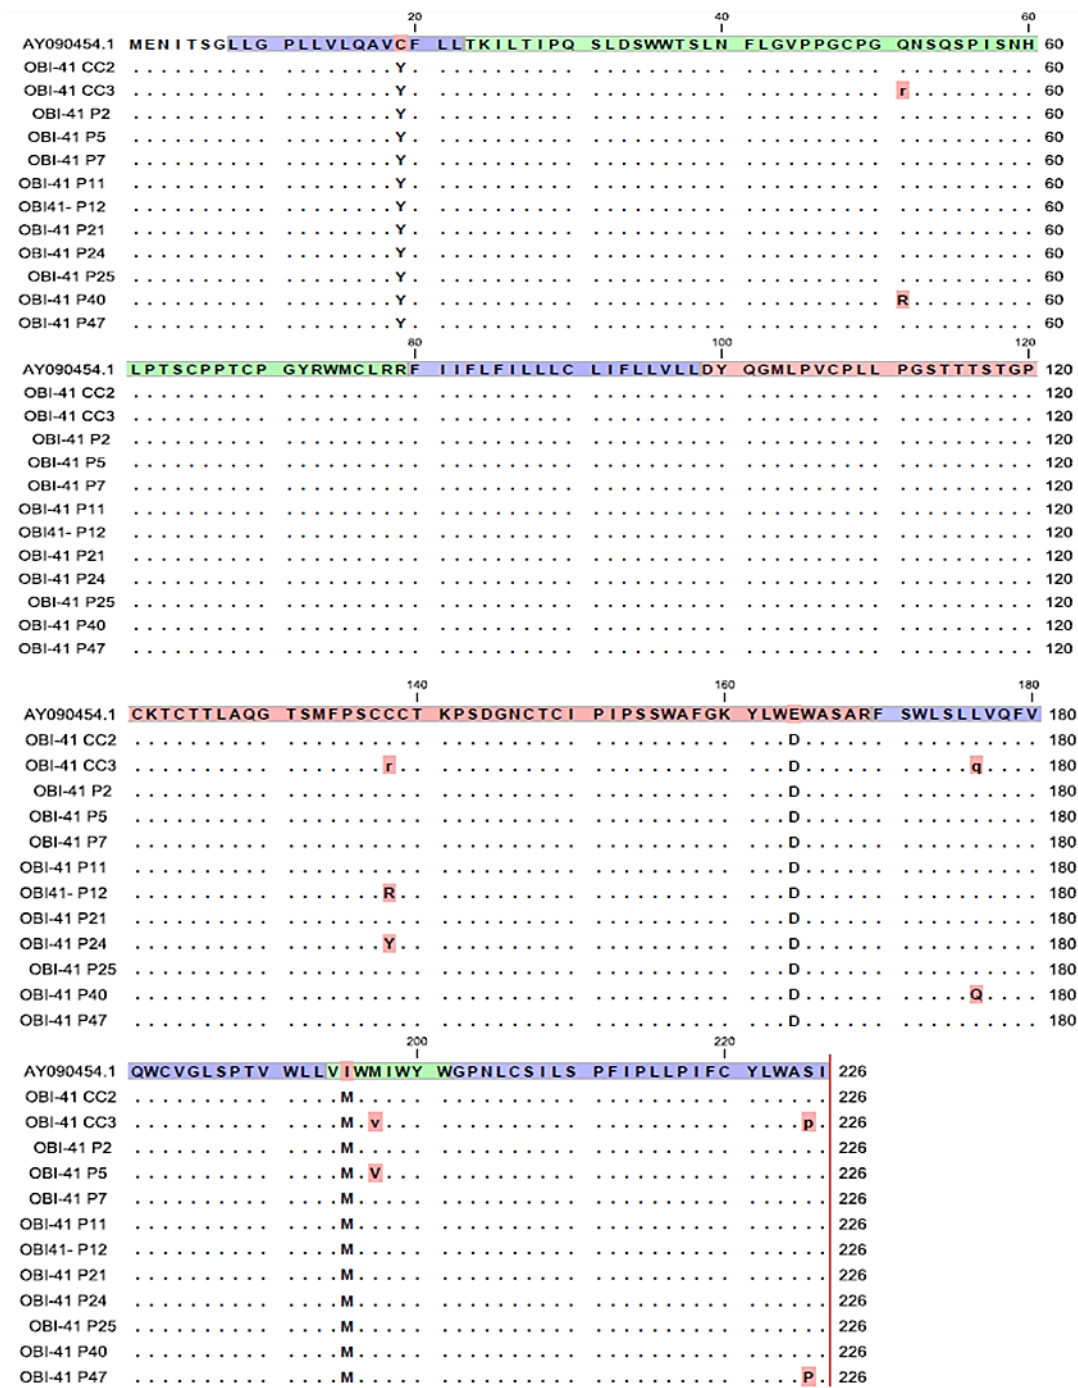

Supplementary Figure 1. Alignment of amino acid sequences deduced from sample clones OBI-43. Residues identical to the genotype H reference consensus are indicated by dots. Mutations in red boxes.

Alignment of amino acid sequences deduced from OBI-43 sample clones

|            |            |            |            |            |            |            |            |            |            |     |
|------------|------------|------------|------------|------------|------------|------------|------------|------------|------------|-----|
| AY090454.1 | MENITSGLLG | 20         | PLLVLQAVCF | 40         | LLTKILTIPQ | SLDSWWTSLN | 60         | FLGVPPGCPG | QNSQSPISNH | 60  |
| OBI-43     | .....      |            | Y.         |            | .....      | .....      |            | .....      | .....      | 60  |
| OBI-43 P1  | .....      |            | Y.         |            | .....      | .....      |            | .....      | .....      | 60  |
| OBI-43 P5  | .....      |            | Y.         |            | .....      | .....      |            | .....      | .....      | 60  |
| OBI-43 P17 | .....      |            | Y.         |            | .....      | .....      |            | .....      | .....      | 60  |
| OBI-43 P19 | .....      |            | Y.         |            | .....      | .....      |            | .....      | .....      | 60  |
| OBI-43 P34 | .....      |            | Y.         |            | .....      | .....      |            | .....      | .....      | 60  |
| OBI-43 P36 | .....      |            | Y.         |            | .....      | .....      |            | .....      | D.         | 60  |
| OBI-43 P37 | .....      |            | Y.         |            | .....      | .....      |            | .....      | .....      | 60  |
| OBI-43 P40 | .....      |            | Y.         |            | .....      | .....      |            | .....      | .....      | 60  |
| OBI-43 P42 | .....      |            | Y.         |            | .....      | .....      |            | .....      | .....      | 60  |
| OBI-43 P43 | .....      |            | Y.         |            | .....      | .....      |            | .....      | .....      | 60  |
| AY090454.1 | 80         | LPTSCPPTCP | 100        | GYRWMCLRRF | 120        | IIFLFILLLC | LIFLLVLLDY | 140        | QGMLPVCPLL | 160 |
| OBI-43     | .....      | .....      | .....      | .....      | .....      | .....      | .....      | .....      | .....      | 120 |
| OBI-43 P1  | .....      | .....      | .....      | .....      | .....      | .....      | .....      | .....      | .....      | 120 |
| OBI-43 P5  | .....      | .....      | .....      | .....      | V.         | .....      | .....      | .....      | .....      | 120 |
| OBI-43 P17 | .....      | .....      | .....      | .....      | .....      | .....      | .....      | Y.         | .....      | 120 |
| OBI-43 P19 | .....      | .....      | .....      | .....      | .....      | .....      | .....      | Y.         | .....      | 120 |
| OBI-43 P34 | .....      | .....      | .....      | .....      | .....      | .....      | .....      | .....      | .....      | 120 |
| OBI-43 P36 | .....      | .....      | .....      | .....      | .....      | .....      | .....      | .....      | .....      | 120 |
| OBI-43 P37 | .....      | C.         | .....      | .....      | .....      | .....      | .....      | Y.         | .....      | 120 |
| OBI-43 P40 | .....      | .....      | .....      | .....      | .....      | .....      | .....      | .....      | .....      | 120 |
| OBI-43 P42 | .....      | .....      | .....      | .....      | .....      | .....      | .....      | .....      | .....      | 120 |
| OBI-43 P43 | .....      | .....      | .....      | .....      | .....      | .....      | .....      | .....      | .....      | 120 |
| AY090454.1 | 140        | CKTCTTLAQG | 160        | TSMFPSCCCT | 180        | KPSDGNCTCI | PIPSSWAFGK | 200        | YLWEWASARF | 220 |
| OBI-43     | .....      | .....      | .....      | .....      | .....      | .....      | .....      | .....      | .....      | 180 |
| OBI-43 P1  | .....      | .....      | .....      | .....      | .....      | .....      | .....      | .....      | .....      | 180 |
| OBI-43 P5  | .....      | .....      | .....      | .....      | .....      | .....      | .....      | .....      | .....      | 180 |
| OBI-43 P17 | .....      | .....      | .....      | .....      | .....      | .....      | .....      | .....      | .....      | 180 |
| OBI-43 P19 | .....      | .....      | .....      | .....      | .....      | .....      | .....      | .....      | .....      | 180 |
| OBI-43 P34 | .....      | .....      | .....      | .....      | .....      | .....      | .....      | C.         | .....      | 180 |
| OBI-43 P36 | .....      | .....      | .....      | .....      | .....      | .....      | .....      | .....      | .....      | 180 |
| OBI-43 P37 | .....      | .....      | .....      | .....      | .....      | .....      | .....      | .....      | .....      | 180 |
| OBI-43 P40 | .....      | .....      | .....      | .....      | .....      | .....      | .....      | .....      | .....      | 180 |
| OBI-43 P42 | .....      | .....      | .....      | .....      | .....      | .....      | .....      | .....      | .....      | 180 |
| OBI-43 P43 | .....      | .....      | .....      | .....      | .....      | .....      | .....      | .....      | .....      | 180 |
| AY090454.1 | 200        | QWCVGLSPTV | 220        | WLLVIWMIWY | 240        | WGPNLCSILS | PFIPLLPIFC | 260        | YLWAS      | 280 |
| OBI-43     | .....      | .....      | .....      | M.         | .....      | .....      | .....      | .....      | .....      | 226 |
| OBI-43 P1  | .....      | T.         | .....      | .....      | .....      | .....      | .....      | .....      | .....      | 226 |
| OBI-43 P5  | .....      | .....      | .....      | .....      | .....      | .....      | .....      | .....      | .....      | 226 |
| OBI-43 P17 | .....      | .....      | .....      | .....      | .....      | .....      | .....      | .....      | .....      | 226 |
| OBI-43 P19 | .....      | T.         | .....      | .....      | .....      | .....      | .....      | .....      | .....      | 226 |
| OBI-43 P34 | .....      | .....      | .....      | .....      | .....      | .....      | .....      | .....      | .....      | 226 |
| OBI-43 P36 | .....      | .....      | .....      | .....      | .....      | .....      | .....      | .....      | .....      | 226 |
| OBI-43 P37 | .....      | .....      | .....      | .....      | .....      | .....      | .....      | .....      | .....      | 226 |
| OBI-43 P40 | .....      | .....      | .....      | .....      | .....      | .....      | .....      | .....      | .....      | 226 |
| OBI-43 P42 | .....      | .....      | .....      | .....      | .....      | .....      | .....      | .....      | .....      | 226 |
| OBI-43 P43 | .....      | .....      | .....      | .....      | .....      | .....      | .....      | .....      | .....      | 226 |

Supplementary Figure 1. Alignment of amino acid sequences deduced from sample clones OBI-43. Residues identical to the genotype H reference consensus are indicated by dots. Mutations in red boxes.

Alignment of amino acid sequences deduced from OBI-44 sample clones

|            |            |                                                           |            |                                                           |            |            |     |
|------------|------------|-----------------------------------------------------------|------------|-----------------------------------------------------------|------------|------------|-----|
|            |            | 20                                                        |            | 40                                                        |            | 60         |     |
| AY090454.1 | MENITSGLLG | PLLVLQAVCF                                                | LLTKILTIPQ | SLDSWWTSLN                                                | FLGVPPGCPG | QNSQSPISNH | 60  |
| OBI-44     | .....      | .....Y.                                                   | .....      | .....                                                     | .....      | .....      | 60  |
| OBI-44 P8  | .....      | ..... <span style="border: 1px solid red;">A</span> .     | .....      | .....                                                     | .....      | .....      | 60  |
| OBI-44 P11 | .....      | .....Y.                                                   | .....      | .....                                                     | .....      | .....      | 60  |
| OBI-44 P12 | .....      | .....Y.                                                   | .....      | .....                                                     | .....      | .....      | 60  |
| OBI-44 P14 | .....      | .....Y.                                                   | .....      | .....                                                     | .....      | .....      | 60  |
| OBI-44 P17 | .....      | .....Y.                                                   | .....      | .....                                                     | .....      | .....      | 60  |
| OBI-44 P19 | .....      | .....Y.                                                   | .....      | .....                                                     | .....      | .....      | 60  |
| OBI-44 P20 | .....      | ..... <span style="border: 1px solid red;">A</span> .     | .....      | .....                                                     | .....      | .....      | 60  |
| OBI-44 P22 | .....      | ..... <span style="border: 1px solid red;">A</span> .     | .....      | .....                                                     | .....      | .....      | 60  |
| OBI-44 P26 | .....      | .....Y.                                                   | .....      | .....                                                     | .....      | .....      | 60  |
| OBI-44 P30 | .....      | .....Y.                                                   | .....      | .....                                                     | .....      | .....      | 60  |
|            |            | 80                                                        |            | 100                                                       |            | 120        |     |
| AY090454.1 | LPTSCPPTCP | GYRWMCLRRF                                                | IIFLFILLIC | LIFLLVLLDY                                                | QGMLPVCPLL | PGSTTTSTGP | 120 |
| OBI-44     | .....      | .....                                                     | .....      | .....                                                     | .....      | .....      | 120 |
| OBI-44 P8  | .....      | .....                                                     | .....      | .....                                                     | .....      | .....      | 120 |
| OBI-44 P11 | .....      | .....                                                     | .....      | .....                                                     | .....      | .....      | 120 |
| OBI-44 P12 | .....      | .....                                                     | .....      | .....                                                     | .....      | .....      | 120 |
| OBI-44 P14 | .....      | .....                                                     | .....      | .....                                                     | .....      | .....      | 120 |
| OBI-44 P17 | .....      | .....                                                     | .....      | .....                                                     | .....      | .....      | 120 |
| OBI-44 P19 | .....      | .....                                                     | .....      | .....                                                     | .....      | .....      | 120 |
| OBI-44 P20 | .....      | .....                                                     | .....      | .....                                                     | .....      | .....      | 120 |
| OBI-44 P22 | .....      | .....                                                     | .....      | .....                                                     | .....      | .....      | 120 |
| OBI-44 P26 | .....      | .....                                                     | .....      | .....                                                     | .....      | .....      | 120 |
| OBI-44 P30 | .....      | .....                                                     | .....      | .....                                                     | .....      | .....      | 120 |
|            |            | 140                                                       |            | 160                                                       |            | 180        |     |
| AY090454.1 | CKTCTTLAQG | TSMFPSCCCT                                                | KPSDGNCTCI | PIPSWAFGK                                                 | YLWEWASARE | SWLSLLVQEV | 180 |
| OBI-44     | .....      | .....                                                     | .....      | .....                                                     | .....      | .....      | 180 |
| OBI-44 P8  | .....      | .....                                                     | .....      | ..... <span style="border: 1px solid red;">S</span> ..... | .....      | .....      | 180 |
| OBI-44 P11 | .....      | .....                                                     | .....      | .....                                                     | .....      | .....      | 180 |
| OBI-44 P12 | .....      | .....                                                     | .....      | .....                                                     | .....      | .....      | 180 |
| OBI-44 P14 | .....      | .....                                                     | .....      | .....                                                     | .....      | .....      | 180 |
| OBI-44 P17 | .....      | .....                                                     | .....      | .....                                                     | .....      | .....      | 180 |
| OBI-44 P19 | .....      | .....                                                     | .....      | .....                                                     | .....      | .....      | 180 |
| OBI-44 P20 | .....      | .....                                                     | .....      | ..... <span style="border: 1px solid red;">S</span> ..... | .....      | .....      | 180 |
| OBI-44 P22 | .....      | ..... <span style="border: 1px solid red;">R</span> ..... | .....      | .....                                                     | .....      | .....      | 180 |
| OBI-44 P26 | .....      | .....                                                     | .....      | .....                                                     | .....      | .....      | 180 |
| OBI-44 P30 | .....      | .....                                                     | .....      | .....                                                     | .....      | .....      | 180 |
|            |            | 200                                                       |            | 220                                                       |            |            |     |
| AY090454.1 | QWCVGLSPTV | WLLVIWMIWY                                                | WGPNLCSILS | PFIPLLPIFC                                                | YLWASI     |            | 226 |
| OBI-44     | .....      | .....                                                     | .....      | .....                                                     | .....      |            | 226 |
| OBI-44 P8  | .....      | .....                                                     | .....      | .....                                                     | .....      |            | 226 |
| OBI-44 P11 | .....      | .....                                                     | .....      | .....                                                     | .....      |            | 226 |
| OBI-44 P12 | .....      | .....                                                     | .....      | .....                                                     | .....      |            | 226 |
| OBI-44 P14 | .....      | .....                                                     | .....      | .....                                                     | .....      |            | 226 |
| OBI-44 P17 | .....      | .....                                                     | .....      | .....                                                     | .....      |            | 226 |
| OBI-44 P19 | .....      | .....                                                     | .....      | .....                                                     | .....      |            | 226 |
| OBI-44 P20 | .....      | .....                                                     | .....      | .....                                                     | .....      |            | 226 |
| OBI-44 P22 | .....      | .....                                                     | .....      | .....                                                     | .....      |            | 226 |
| OBI-44 P26 | .....      | .....                                                     | .....      | .....                                                     | .....      |            | 226 |
| OBI-44 P30 | .....      | .....                                                     | .....      | .....                                                     | .....      |            | 226 |

Supplementary Figure 1. Alignment of amino acid sequences deduced from sample clones OBI-44. Residues identical to the genotype H reference consensus are indicated by dots. Mutations in red boxes.

Alignment of amino acid sequences deduced from OBI-50 sample clones

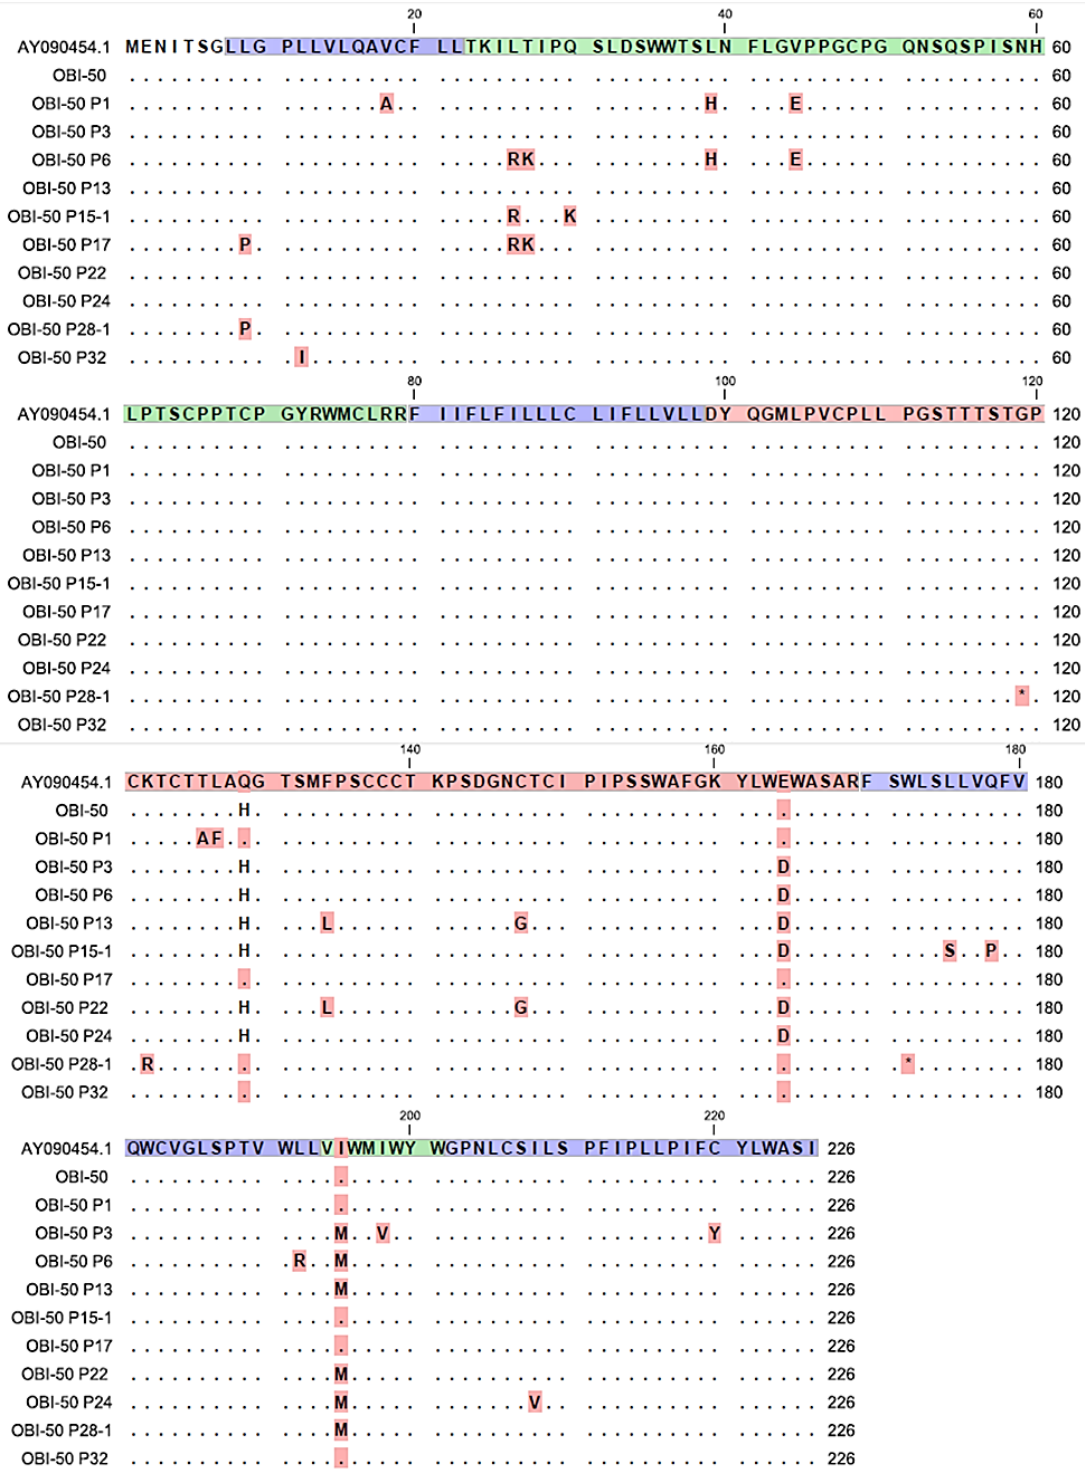

Supplementary Figure 1. Alignment of amino acid sequences deduced from sample clones OBI-50. Residues identical to the genotype H reference consensus are indicated by dots. Mutations in red boxes.





Alignment of amino acid sequences deduced from OBI-62 sample clones

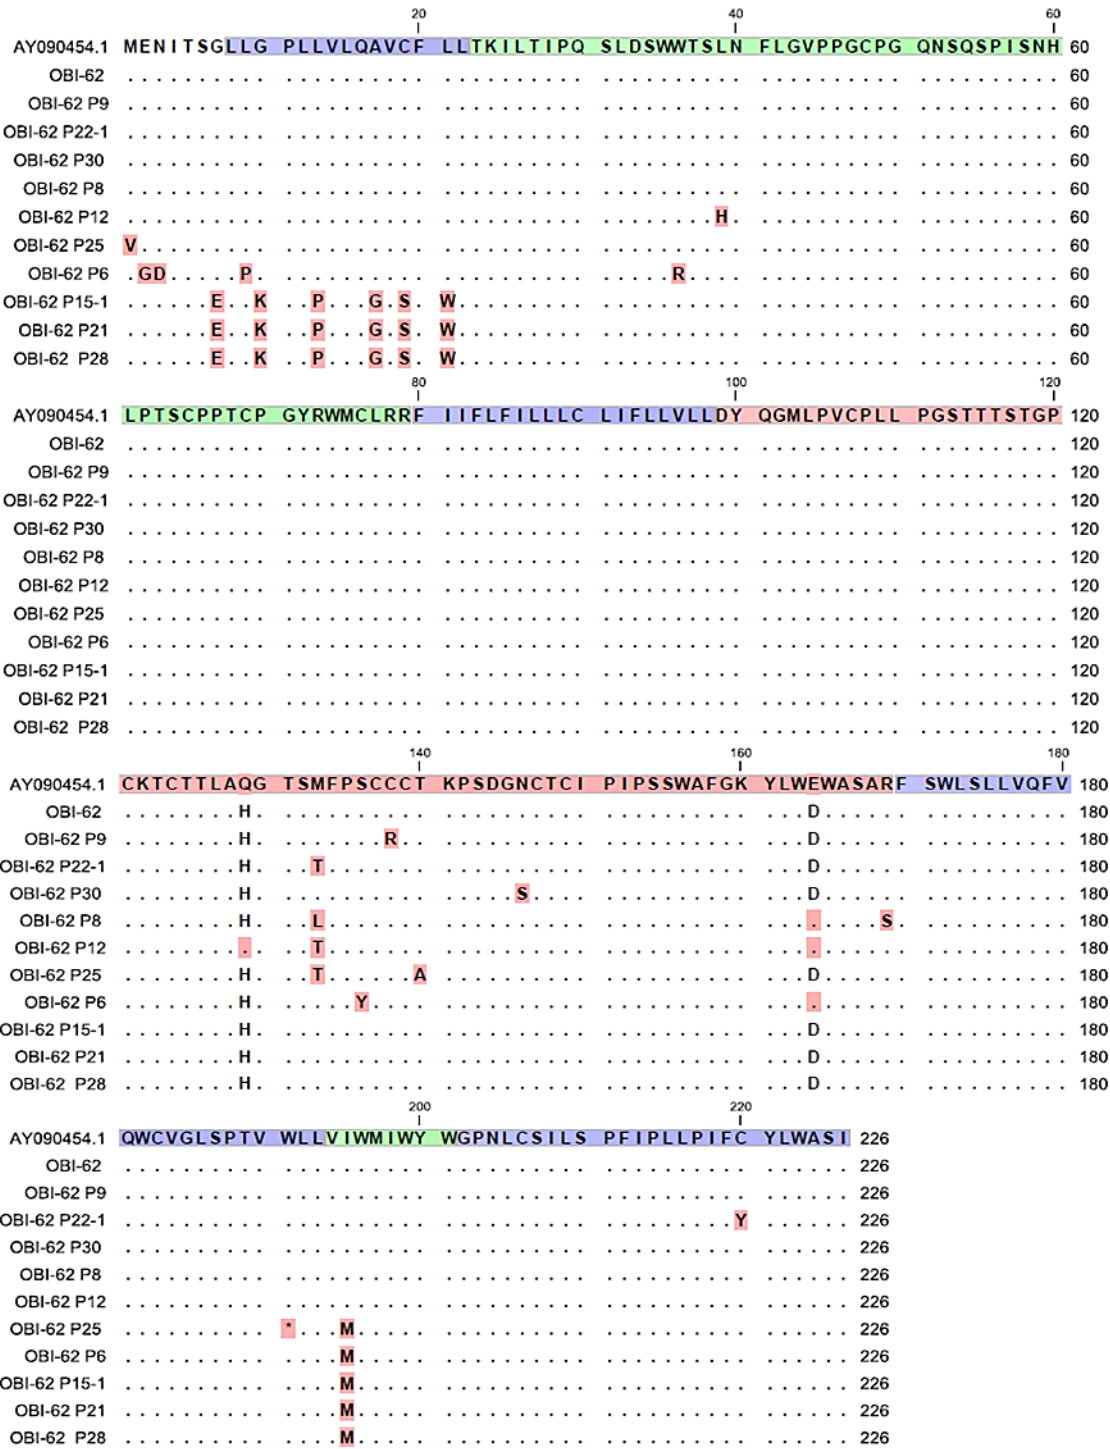

Supplementary Figure 1. Alignment of amino acid sequences deduced from sample clones OBI-62. Residues identical to the genotype H reference consensus are indicated by dots. Mutations in red boxes.

Alignment of amino acid sequences deduced from OBI-75 sample clones

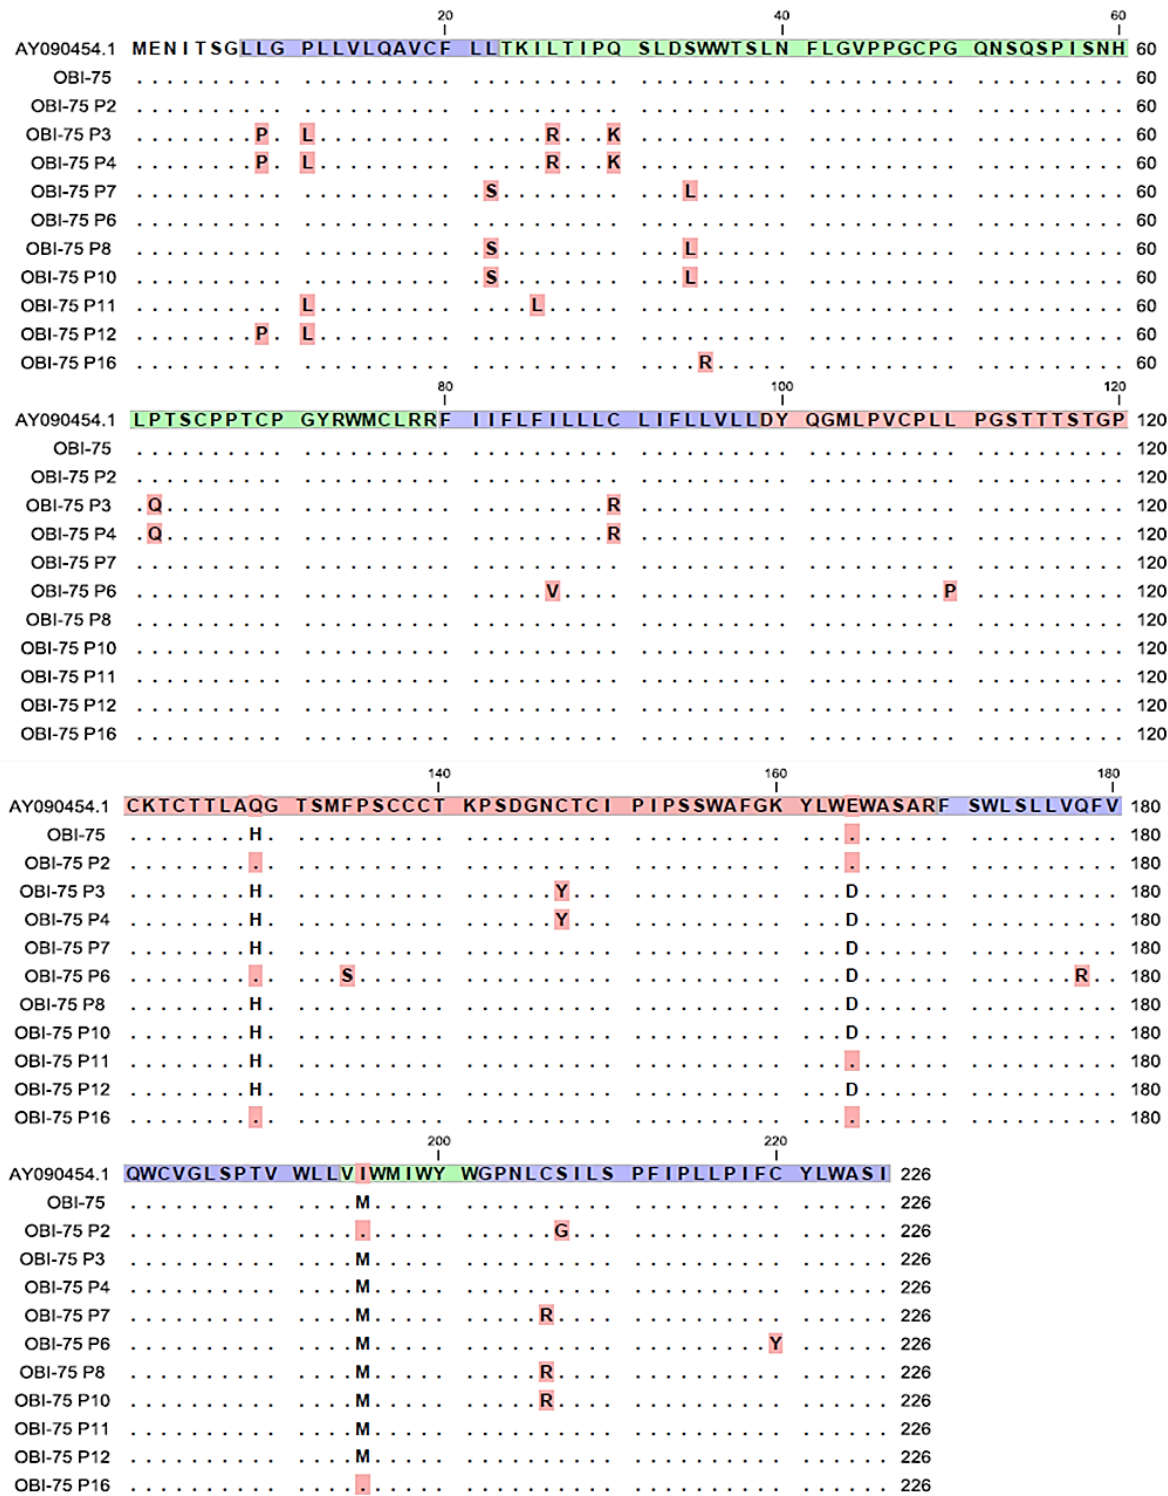

Supplementary Figure 1. Alignment of amino acid sequences deduced from sample clones OBI-75. Residues identical to the genotype H reference consensus are indicated by dots. Mutations in red boxes.



Alignment of amino acid sequences deduced from OBI-106 sample clones

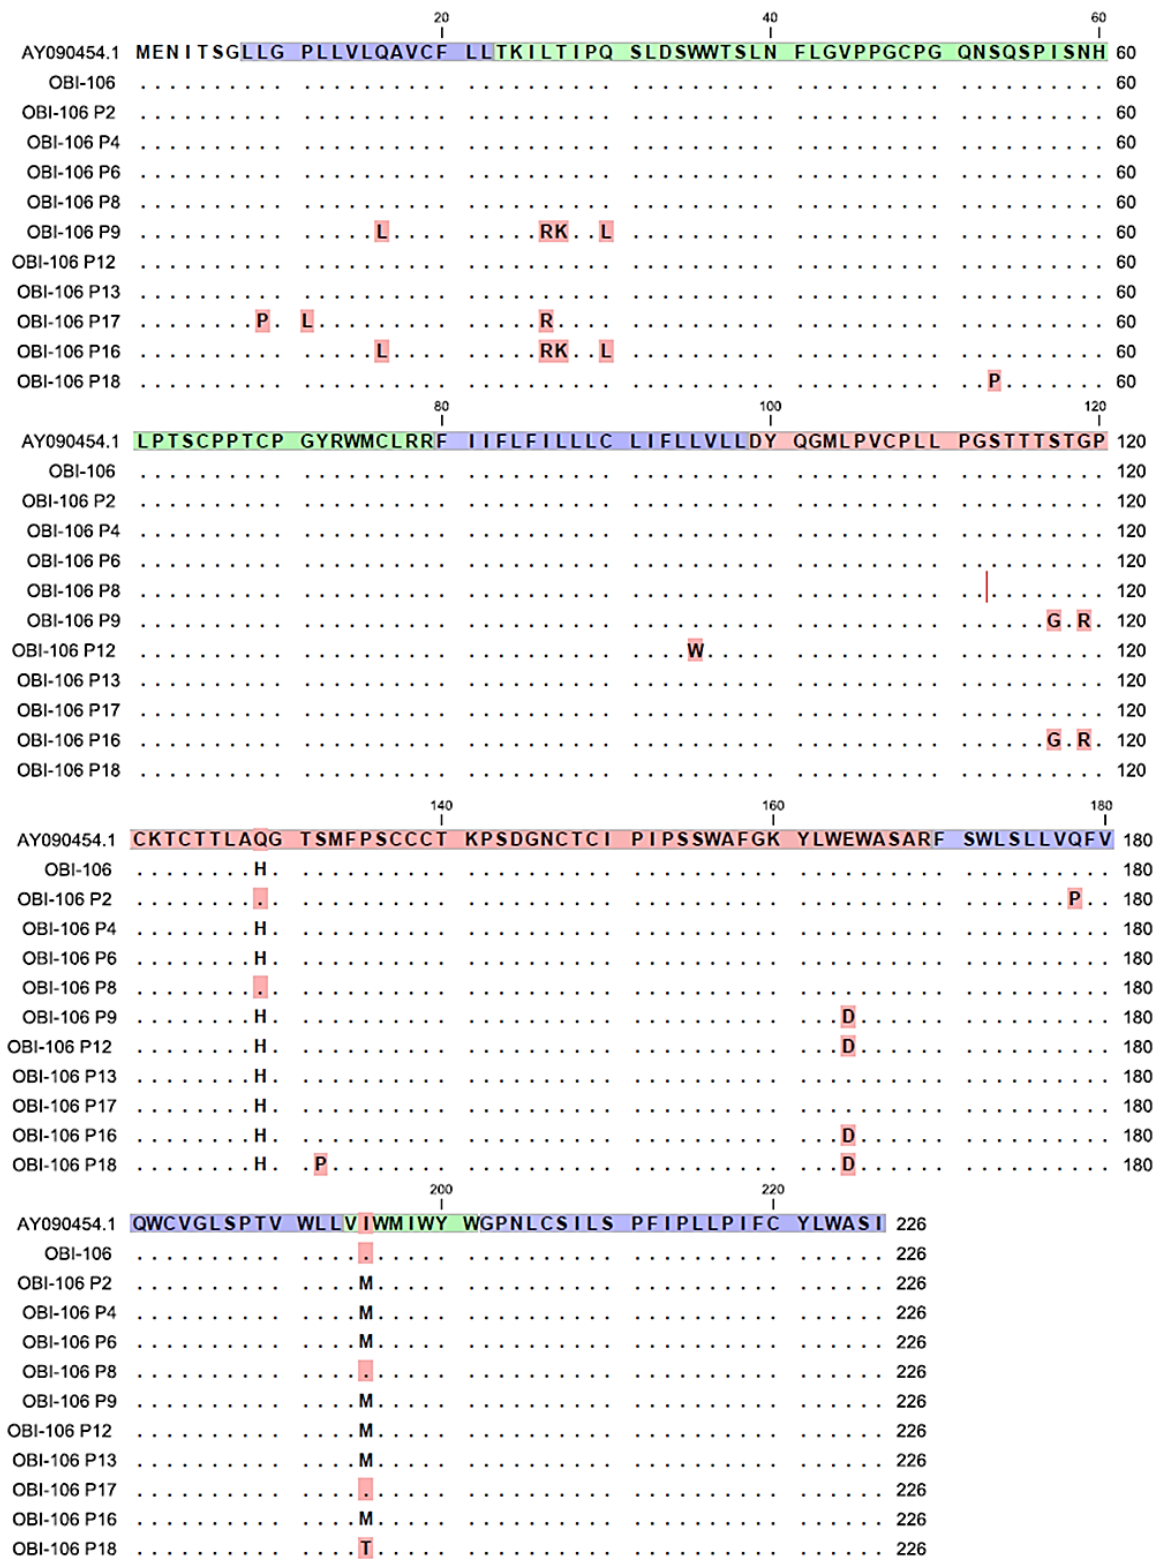

**Supplementary Figure 1.** Alignment of amino acid sequences deduced from sample clones OBI-106. Residues identical to the genotype H reference consensus are indicated by dots. Mutations in red boxes.

Alignment of amino acid sequences deduced from OBI-112 sample clones

|             |            |             |            |            |            |             |     |
|-------------|------------|-------------|------------|------------|------------|-------------|-----|
|             |            | 20          |            | 40         |            | 60          |     |
| AY090454.1  | MENITSGLLG | PLLVLQAVCF  | LLTKILTIPQ | SLDSWWTSLN | FLGVPPGCPG | QNSQSPI SNH | 60  |
| OBI-112     | .....      | .....Y.     | .....      | .....      | .....      | .....       | 60  |
| OBI-112 P3  | .....      | .....Y.     | .....      | .....      | .....      | .....       | 60  |
| OBI-112 P10 | .....      | .....Y.     | .....      | .....      | .....      | .....       | 60  |
| OBI-112 P11 | .....      | .....Y.     | .....      | .....      | .....      | .....       | 60  |
| OBI-112 P12 | .....      | .....Y.     | .....      | .....      | .....      | .....       | 60  |
| OBI-112 P13 | .....      | .....Y.     | .....      | .....      | .....      | .....       | 60  |
| OBI-112 P4  | .....      | .....Y.     | .....      | .....      | .....      | .....       | 60  |
| OBI-112 P9  | .....      | ......      | .....      | .....      | .....      | .....       | 60  |
| OBI-112 P15 | .....      | .....Y.     | .....      | .....      | .....      | .....       | 60  |
|             |            | 80          |            | 100        |            | 120         |     |
| AY090454.1  | LPTSCPPTCP | GYRWMCLRRF  | IIFLFILLLC | LIFLLVLLDY | QGMLPVCPLL | PGSTTTSTGP  | 120 |
| OBI-112     | .....      | .....       | .....      | .....      | .....      | .....       | 120 |
| OBI-112 P3  | .....      | .....       | .....      | .....      | .....      | .....       | 120 |
| OBI-112 P10 | .....      | .....       | .....      | .....      | .....      | .....       | 120 |
| OBI-112 P11 | .....      | .....       | .....      | .....      | .....      | .....       | 120 |
| OBI-112 P12 | .....      | .....       | .....      | .....      | .....      | .....       | 120 |
| OBI-112 P13 | .....      | .....       | .....      | .....      | .....      | .....       | 120 |
| OBI-112 P4  | .....      | .....       | .....      | .....      | .....      | .....       | 120 |
| OBI-112 P9  | .....      | .....       | .....      | .....      | .....      | .....       | 120 |
| OBI-112 P15 | .....      | .....R.     | .....      | .....      | .....      | .....       | 120 |
|             |            | 140         |            | 160        |            | 180         |     |
| AY090454.1  | CKTCTTLAQG | TSMFPSCCCT  | KPSDGNCTCI | PIPSSWAFGK | YLWEWASARF | SWLSLLVQFV  | 180 |
| OBI-112     | .....      | .....       | .....      | .....      | .....      | .....       | 180 |
| OBI-112 P3  | .....      | .....       | .....      | .....      | .....      | .....       | 180 |
| OBI-112 P10 | .....      | .....       | .....      | .....      | .....      | .....       | 180 |
| OBI-112 P11 | .....      | .....       | .....      | .....      | .....      | .....       | 180 |
| OBI-112 P12 | .....      | .....       | .....      | .....      | .....      | .....       | 180 |
| OBI-112 P13 | .....      | .....       | .....      | .....      | .....      | .....       | 180 |
| OBI-112 P4  | .....      | .....       | .....      | .....      | .....      | .....       | 180 |
| OBI-112 P9  | .....      | .....       | .....      | .....      | .....      | .....       | 180 |
| OBI-112 P15 | .....      | .....       | .....      | .....      | .....      | .....       | 180 |
|             |            | 200         |            | 220        |            |             |     |
| AY090454.1  | QWCVGLSPTV | WLLVITWMIWY | WGPNLCSILS | PFIPLLPIFC | YLWASI     |             | 226 |
| OBI-112     | .....      | ......      | .....      | .....      | .....      | .....       | 226 |
| OBI-112 P3  | .....      | .....M.     | .....      | .....      | .....      | .....       | 226 |
| OBI-112 P10 | .....      | .....M.     | .....      | .....      | .....      | .....       | 226 |
| OBI-112 P11 | .....      | .....M.     | .....      | .....      | .....      | .....       | 226 |
| OBI-112 P12 | .....      | .....M.     | .....      | .....      | .....      | .....       | 226 |
| OBI-112 P13 | .....      | .....M.     | .....      | .....      | .....      | .....       | 226 |
| OBI-112 P4  | .....      | .....M.     | .....      | .....      | .....      | .....       | 226 |
| OBI-112 P9  | .....A.    | .....M.     | .....      | .....      | .....      | .....       | 226 |
| OBI-112 P15 | .....      | .....M.     | .....      | .....      | .....      | .....       | 226 |

Supplementary Figure 1. Alignment of amino acid sequences deduced from sample clones OBI-112. Residues identical to the genotype H reference consensus are indicated by dots. Mutations in red boxes.
